# Supplementary material for: Colorimetric filtrations of metal chelate precipitations for the quantitative determination of nickel(ii) and lead(ii)
Source: Royal Society of Chemistry journal article supplement (doi:10.1039/c1an15290d), 2011-01-01
Supplement: c1an15290d.pdf [file c1an15290d.pdf]

## Supplementary Information:

### Colorimetric filtrations of metal chelate precipitations for the quantitative determination of nickel(II) and lead(II)

Liang Feng,\* Yue Zhang, Liying Wen, Liang Chen, Zheng Shen, Yafeng Guan\*

Laboratory of Instrumentation and Analytical Chemistry, Key Lab of Separation Science for Analytical Chemistry of CAS, Dalian Institute of Chemical Physics, CAS, Dalian, Liaoning 116023, P. R. China,  
E-mail: fengl@dicp.ac.cn; guanyafeng@dicp.ac.cn

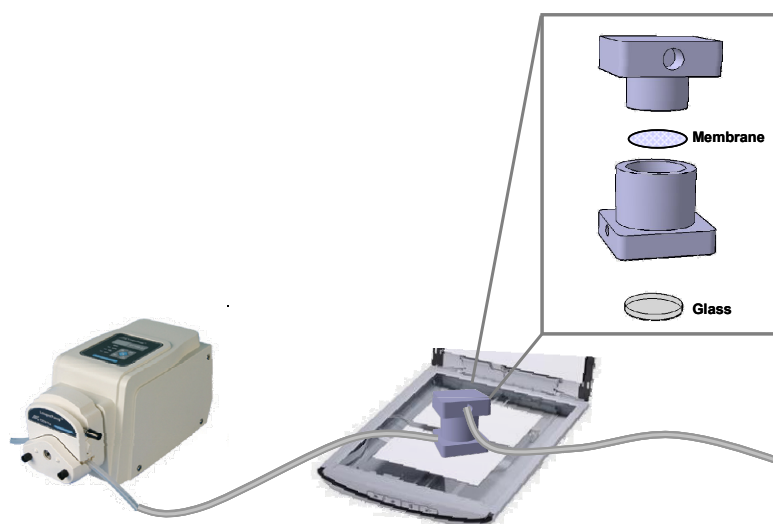

Figure S1. The experimental set-up for colorimetric filtrations of metal chelate precipitations.

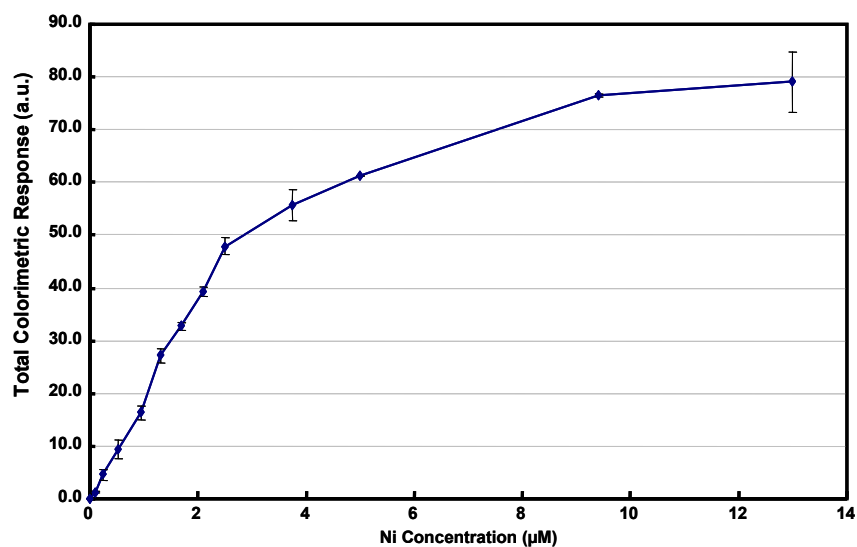

Figure S2. The relationship between total colorimetric response and Ni<sup>2+</sup> concentrations.

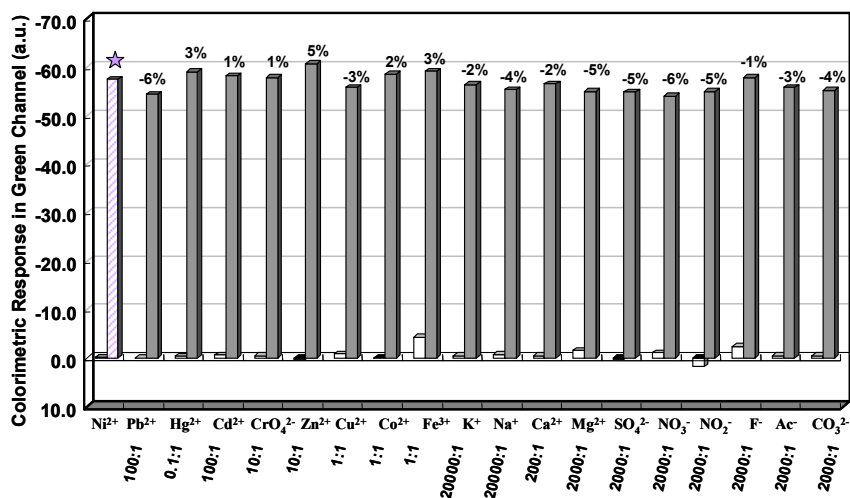

Figure S3. The colorimetric responses of nioxime-coexistence ions w/o Ni<sup>2+</sup> on cellulose acetate/nitrate membranes in green channel of a) grey columns: nioxime-Ni<sup>2+</sup> complex compound with the coexistence of 18 different interferant ions; b) white columns: 18 different individual interferant ions without Ni<sup>2+</sup>.

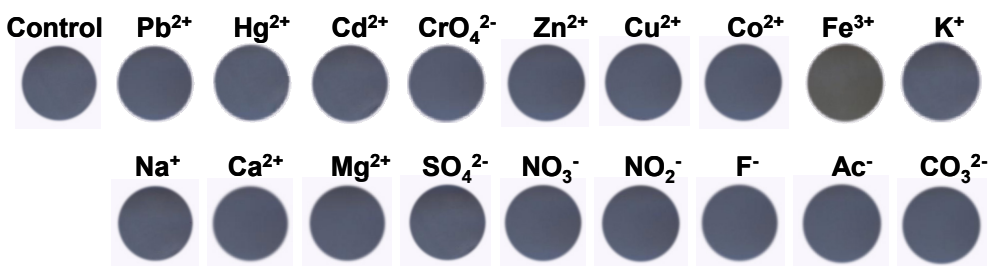

Figure S4. The colours of cellulose acetate/nitrate membrane after 5 min filtration of nioxime-coexistent metal complex compound.

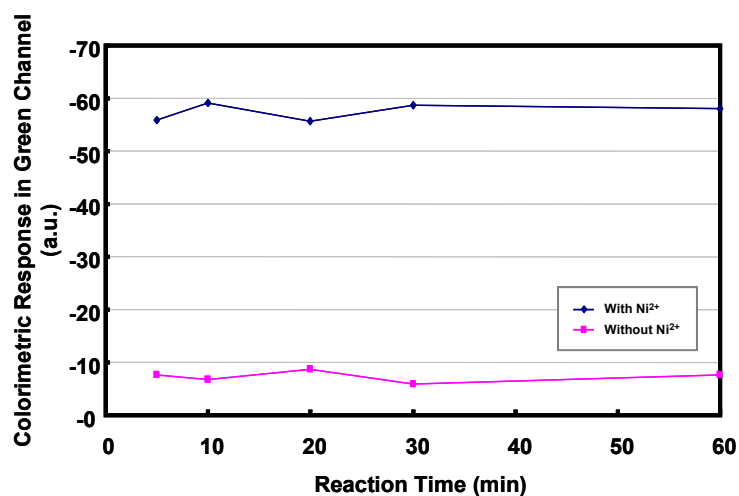

Figure S5. The effect of nioxime-Ni<sup>2+</sup> precipitation time to colorimetric response in green channel.

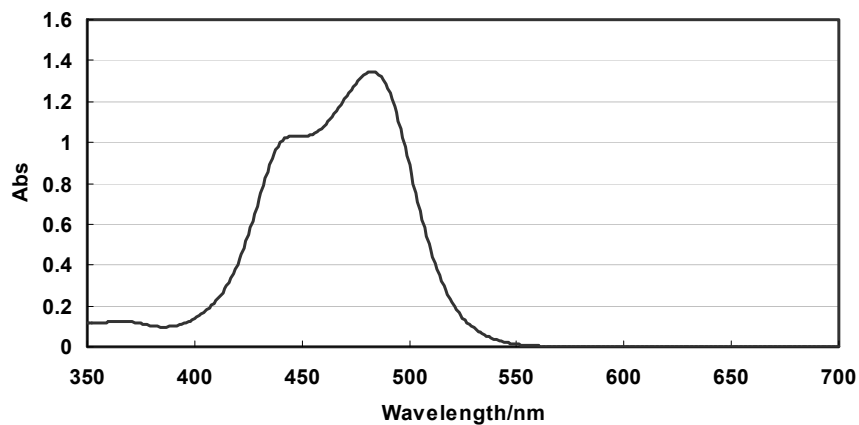

Figure S6. The UV-Vis spectrum of Rhodizonic acid disodium salt (10 mg/L).

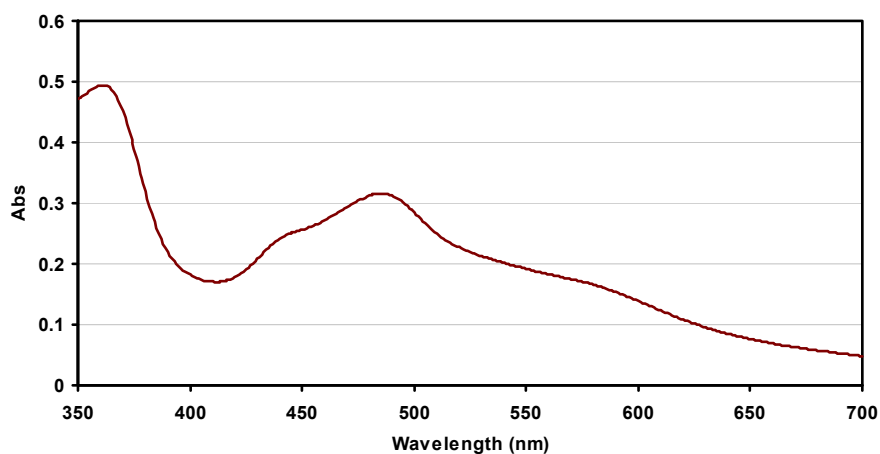

Figure S7. The UV-Vis spectrum of Rhodizonic acid disodium salt-Pb<sup>2+</sup> complex compound.

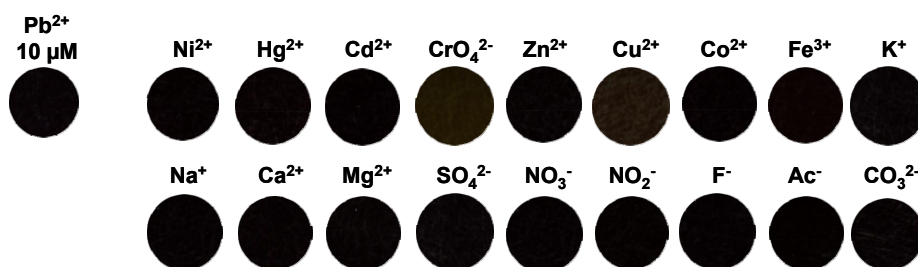

Figure S8. The colours of cellulose acetate/nitrate membrane after 10 min filtration of rhodizonic acid disodium salt-Pb<sup>2+</sup> complex compound at the existence of 18 interferant ions at different tolerance ratios.

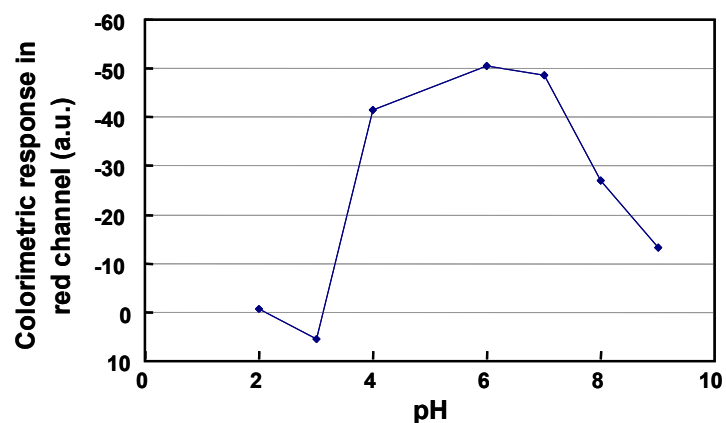

Figure S9. pH dependent colorimetric response in red channel of  $\text{Pb}^{2+}$ -rhodizonic acid disodium salt complex compound.

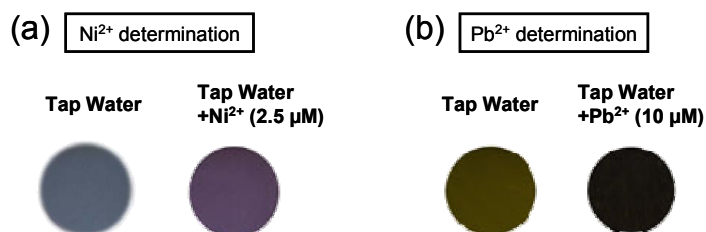

Figure S10. (a)  $\text{Ni}^{2+}$  determination in tap water.  $\text{Ni}^{2+}$  content in tap water was first determined. Using our approach, the  $\text{Ni}^{2+}$  content in tap water was calculated as 180 nM, which is below WHO drinking water safe-exposure standard and also in agreement with the results from city water supply company (~130 nM). A 2.5  $\mu\text{M}$   $\text{Ni}^{2+}$  standard sample in tap water was also investigated, and the result was 1.9  $\mu\text{M}$  using our approach; (b)  $\text{Pb}^{2+}$  determination in tap water. Our approach can not be used to detect tap water directly since the drinking water safe-exposure standard is pretty low (0.01 mg/L). But a 10  $\mu\text{M}$   $\text{Pb}^{2+}$  standard sample in tap water was still tested, and the result was 6.8  $\mu\text{M}$  using our approach.

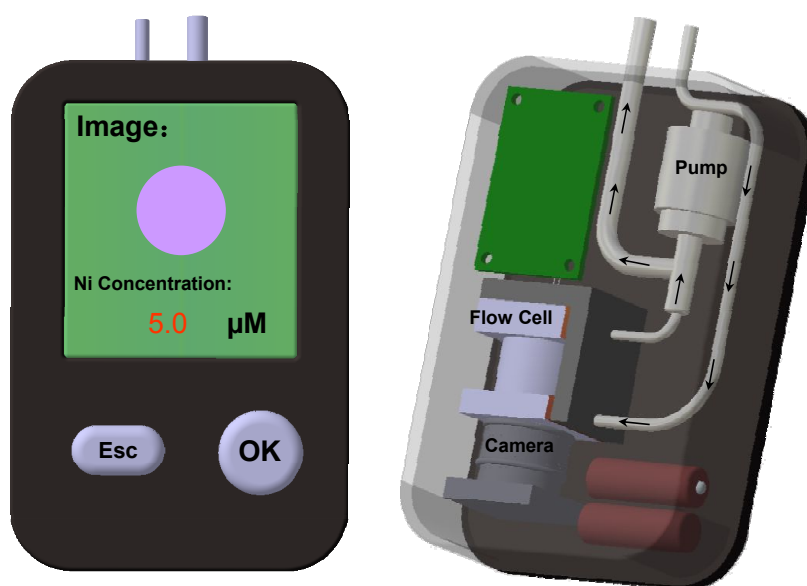

Figure S11. The schematic functional handheld unit for  $\text{Ni}^{2+}$  determination.

Table S1. The colorimetric response of single rhodizonic acid disodium salt-Pb<sup>2+</sup> and rhodizonic acid disodium salt-Pb<sup>2+</sup>-coexistence ions.

|                                | Concn    | Control ED | Control (Red) | Control (Green) | Control (Blue) | Total ED | Channel Red | Channel Green | Channel Blue | Deviation(%) Red | Deviation(%) Green | Deviation(%) Blue | Ratio |
|--------------------------------|----------|------------|---------------|-----------------|----------------|----------|-------------|---------------|--------------|------------------|--------------------|-------------------|-------|
| Pb <sup>2+</sup>               | 1.00E-05 | 3.43       | -0.07         | 0.70            | 3.08           | 75.14    | -49.82      | -54.28        | -12.62       | 0                | 0                  | 0                 | 1     |
| Ni <sup>2+</sup>               | 1.00E-05 | 17.03      | -1.18         | 1.26            | 16.94          | 72.06    | -50.15      | -51.73        | -1.20        | 1                | -5                 | -91               | 1     |
| Hg <sup>2+</sup>               | 1.00E-06 | 21.03      | 0.22          | 1.78            | 20.95          | 73.27    | -50.33      | -53.15        | -3.16        | 1                | -2                 | -75               | 0.1   |
| Cd <sup>2+</sup>               | 1.00E-05 | 7.76       | -1.49         | 0.91            | 7.56           | 77.80    | -54.38      | -55.43        | -4.75        | 9                | 2                  | -62               | 1     |
| CrO <sub>4</sub> <sup>2-</sup> | 1.00E-06 | 5.54       | -2.48         | 0.53            | 4.93           | 76.55    | -52.83      | -54.91        | -7.32        | 6                | 1                  | -42               | 0.1   |
| Zn <sup>2+</sup>               | 1.00E-04 | 38.25      | -4.04         | 0.71            | 38.03          | 71.62    | -50.51      | -50.70        | -2.76        | 1                | -7                 | -78               | 10    |
| Cu <sup>2+</sup>               | 1.00E-06 | 6.11       | -0.22         | 1.43            | 2.60           | 63.69    | -44.23      | -45.82        | 0.31         | -11              | -18                | -102              | 0.1   |
| Co <sup>2+</sup>               | 1.00E-05 | 9.01       | -1.67         | -0.09           | 8.85           | 77.63    | -54.29      | -55.16        | -6.10        | 9                | 2                  | -52               | 1     |
| Fe <sup>3+</sup>               | 1.00E-05 | 14.24      | -6.49         | -12.39          | -2.68          | 69.89    | -46.03      | -52.40        | -4.46        | -8               | -4                 | -65               | 1     |
| K <sup>+</sup>                 | 1.00E-02 | 4.33       | -1.01         | -1.10           | 4.06           | 72.01    | -49.91      | -51.84        | -2.73        | 0                | -5                 | -78               | 1000  |
| Na <sup>+</sup>                | 1.00E-02 | 5.91       | -0.59         | 0.38            | 5.86           | 66.69    | -45.79      | -48.46        | 1.50         | -8               | -12                | -112              | 1000  |
| Ca <sup>2+</sup>               | 1.00E-03 | 13.57      | -1.63         | 0.33            | 13.57          | 75.76    | -53.34      | -53.73        | -2.90        | 7                | -1                 | -77               | 100   |
| Mg <sup>2+</sup>               | 1.00E-02 | 17.47      | -0.58         | 1.21            | 17.42          | 73.77    | -51.80      | -52.45        | -2.78        | 4                | -3                 | -78               | 1000  |
| SO <sub>4</sub> <sup>2-</sup>  | 1.00E-02 | 13.05      | -9.80         | -8.61           | 0.42           | 71.25    | -50.15      | -50.61        | -0.30        | 1                | -7                 | -98               | 1000  |
| NO <sub>3</sub> <sup>-</sup>   | 1.00E-02 | 4.33       | -1.01         | -1.10           | 4.06           | 72.01    | -49.91      | -51.84        | -2.73        | 0                | -5                 | -78               | 1000  |
| NO <sub>2</sub> <sup>-</sup>   | 1.00E-02 | 2.39       | 1.42          | 0.35            | 1.89           | 74.93    | -52.64      | -53.14        | -4.42        | 6                | -2                 | -65               | 1000  |
| F <sup>-</sup>                 | 1.00E-02 | 15.85      | 6.97          | 8.22            | 11.62          | 73.34    | -51.52      | -52.19        | -0.85        | 3                | -4                 | -93               | 1000  |
| Ac <sup>-</sup>                | 1.00E-03 | 3.16       | -0.16         | 0.10            | 3.15           | 75.75    | -52.63      | -54.36        | -3.65        | 6                | 0                  | -71               | 100   |
| CO <sub>3</sub> <sup>2-</sup>  | 1.00E-05 | 4.93       | -0.65         | 0.24            | 4.88           | 75.62    | -53.07      | -53.62        | -5.17        | 7                | -1                 | -59               | 1     |
